# Supplementary material for: Strong interlayer coupling and unusual antisite defect-mediated p-type conductivity in GePx (x = 1, 2)
Source: Royal Society of Chemistry journal article supplement (doi:10.1039/d3nr01677c), 2023-01-01
Supplement: d3nr01677c1.pdf [file d3nr01677c1.pdf]

Electronic Supplementary Information (ESI) for Nanoscale. This journal is © The Royal Society of Chemistry 2022

## Electronic Supplementary Information

Strong interlayer coupling and unusual antisite defects mediated p-type conductivity in  $\text{GeP}_x$  ( $x = 1, 2$ )

Guoxujia Chen<sup>a</sup>, Weiwei Meng<sup>b\*</sup>, Xiaoxi Guan,<sup>a</sup> Peili Zhao,<sup>a</sup> Shuangfeng Jia<sup>a</sup>, He Zheng<sup>acd</sup>, Dongshan Zhao<sup>a\*</sup>, and Jianbo Wang<sup>ae\*</sup>

- a. School of Physics and Technology, Center for Electron Microscopy, MOE Key Laboratory of Artificial Micro- and Nano-structures, and Institute for Advanced Studies, Wuhan University, Wuhan 430072, China
- b. South China Academy of Advanced Optoelectronics, South China Normal University, Guangzhou 510006, China
- c. Suzhou Institute of Wuhan University, Suzhou, Jiangsu 215123, China
- d. Wuhan University Shenzhen Research Institute, Shenzhen, Guangdong 518057, China
- e. Core Facility of Wuhan University, Wuhan 430072, China

### Corresponding Author

\*Email: wang@whu.edu.cn; [dszhao@whu.edu.cn](mailto:dszhao@whu.edu.cn); [meng@whu.edu.cn](mailto:meng@whu.edu.cn).

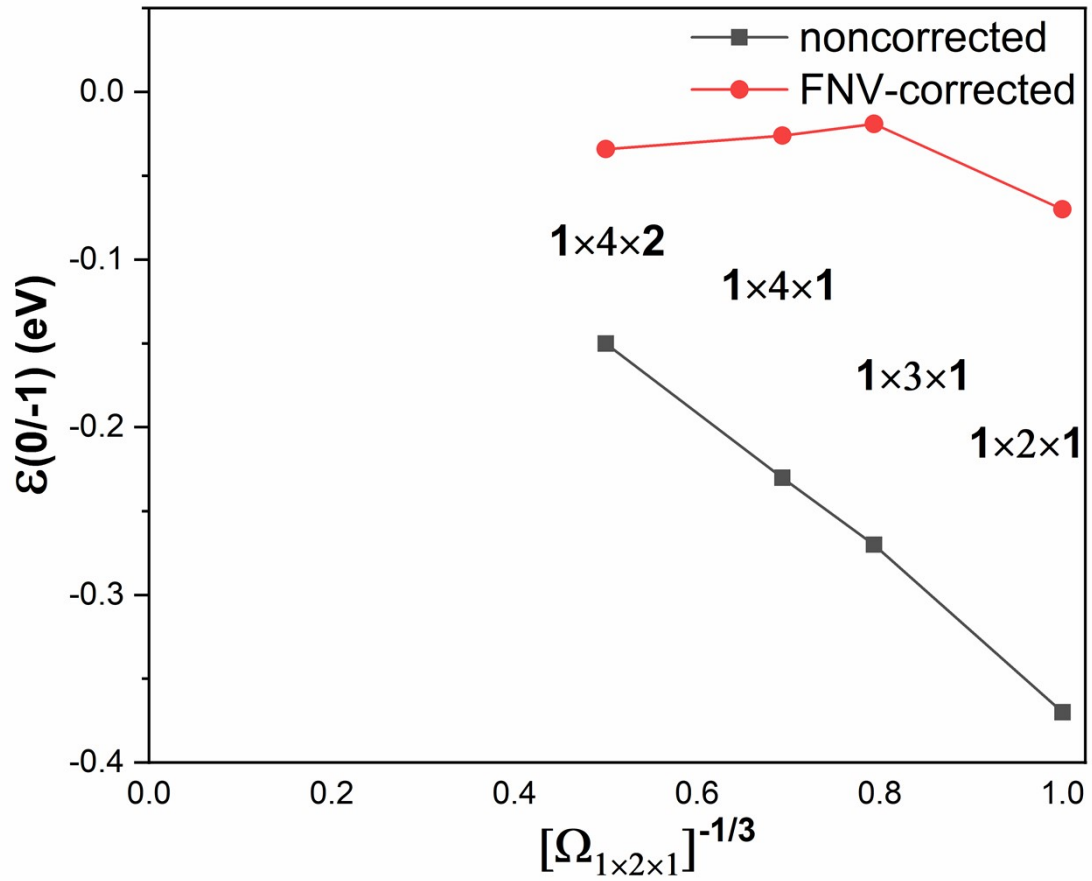

**Figure S1.** The transition energy level of P vacancy,  $\epsilon(0/-1)$ , calculated with varied volume  $\Omega$  (in unit of volume of  $1 \times 2 \times 1$  supercell,  $\Omega_{1 \times 2 \times 1}$ ) of supercells in bulk GeP.

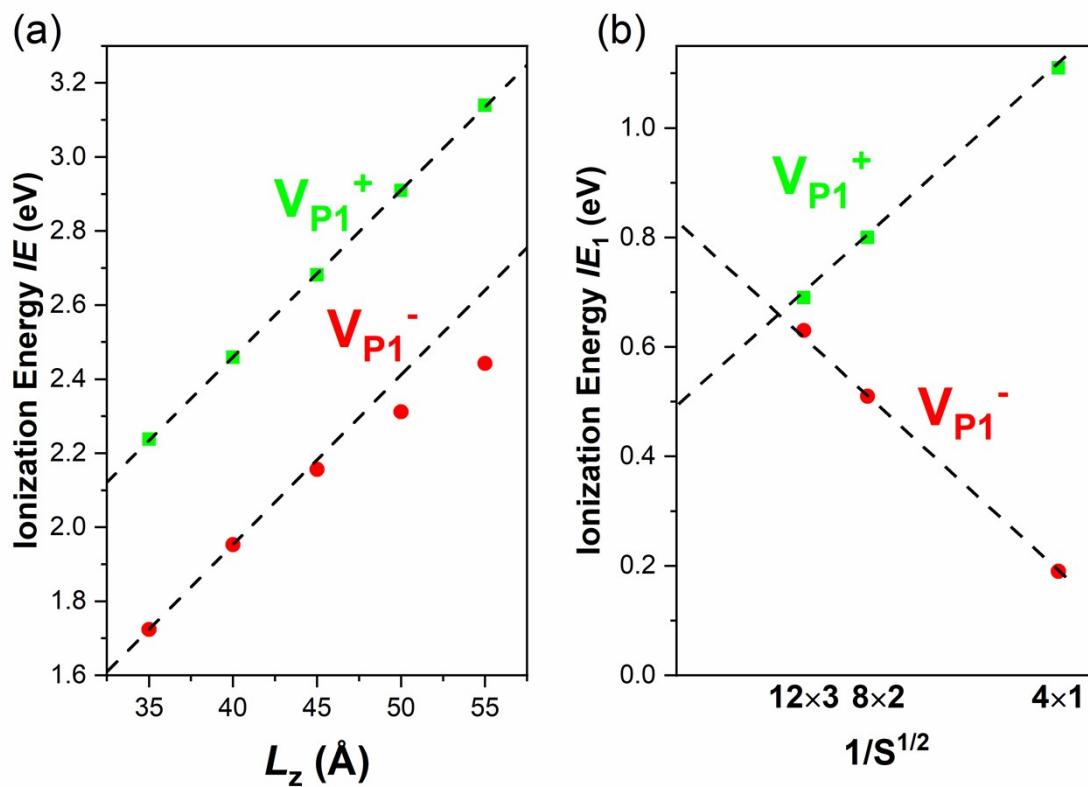

**Figure S2.** Transition energy level (ionization energy)  $\epsilon(+1/0)$  and  $\epsilon(0/-1)$  of P vacancy as a function of (a) the length of the slab in the z-direction and (b)  $1/S^{1/2}$  (S: the lateral size of slab).

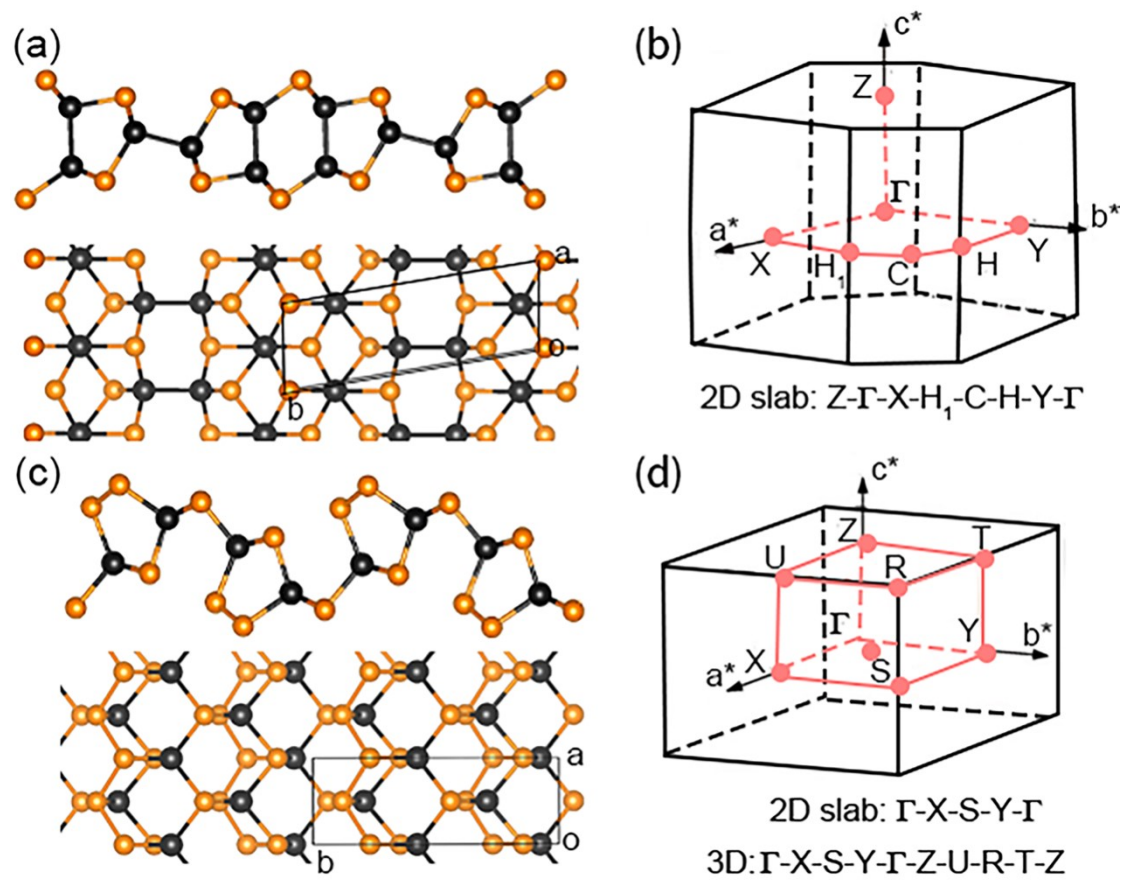

**Figure S3.** (a) Structures of 1L GeP and (b) high-symmetry path of k-points in the reciprocal space, (c) structures of 1L GeP<sub>2</sub> and (d) high-symmetry path of k-points in the reciprocal space.

**Table S1.** Theoretical lattice constants ( $a$ ), bandgaps ( $E_g$ ) of GeP and GeP<sub>2</sub> with experimental values or calculated results for comparison.

|                  |                         | $a$ (Å) | $b$ (Å) | $c$ (Å) | $\beta$ (°) | $E_g$ (eV) |      | $\Delta E_g$ (eV)       |
|------------------|-------------------------|---------|---------|---------|-------------|------------|------|-------------------------|
|                  |                         |         |         |         |             | bulk       | 1L   | $E_g^{1L} - E_g^{bulk}$ |
| GeP              | This work               | 15.36   | 3.71    | 9.31    | 79.28       | 1.07       | 2.39 | 1.32                    |
|                  | Theo. <sup>10</sup>     | 15.86   | 3.70    | 9.33    | 79.24       | 0.94       | 2.31 | 1.37                    |
|                  | Exptl. <sup>32,33</sup> | 15.14   | 3.64    | 9.19    | 78.90       | 0.9        | 2.3  | 1.4                     |
| GeP <sub>2</sub> | This work               | 3.57    | 10.18   | 14.35   | 90          | 1.65       | 2.01 | 0.36                    |
|                  | Theo. <sup>34</sup>     | 3.54    | 10.40   | 14.52   | 90          | -          | 1.98 | -                       |

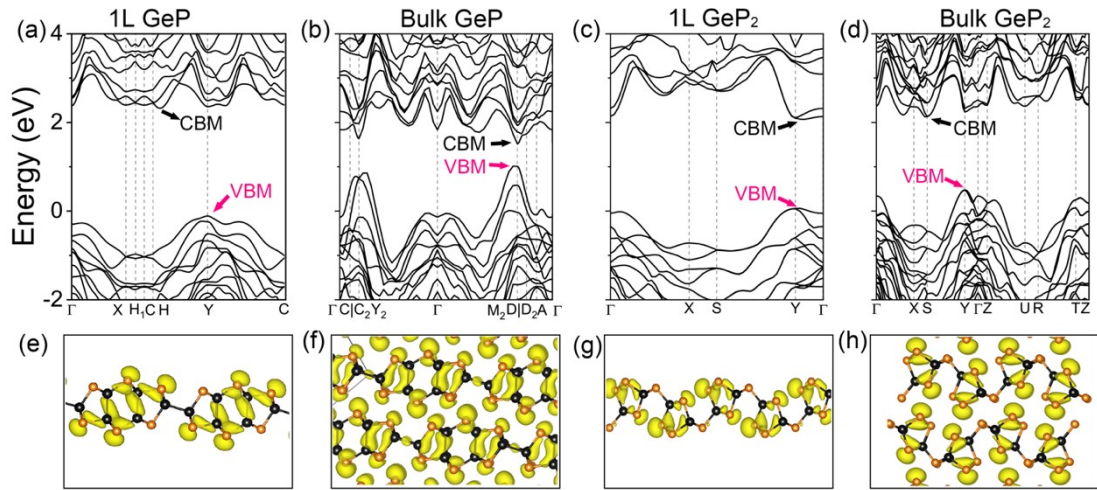

**Figure S4.** HSE06 calculated band structures and VBM partial charge densities of (a) 1L GeP, (b) bulk GeP, (c) 1L GeP<sub>2</sub> and (d) bulk GeP<sub>2</sub>. Energy levels are aligned with respect to vacuum level, and the zero point of energy is situated at the Fermi level of 1L GeP.

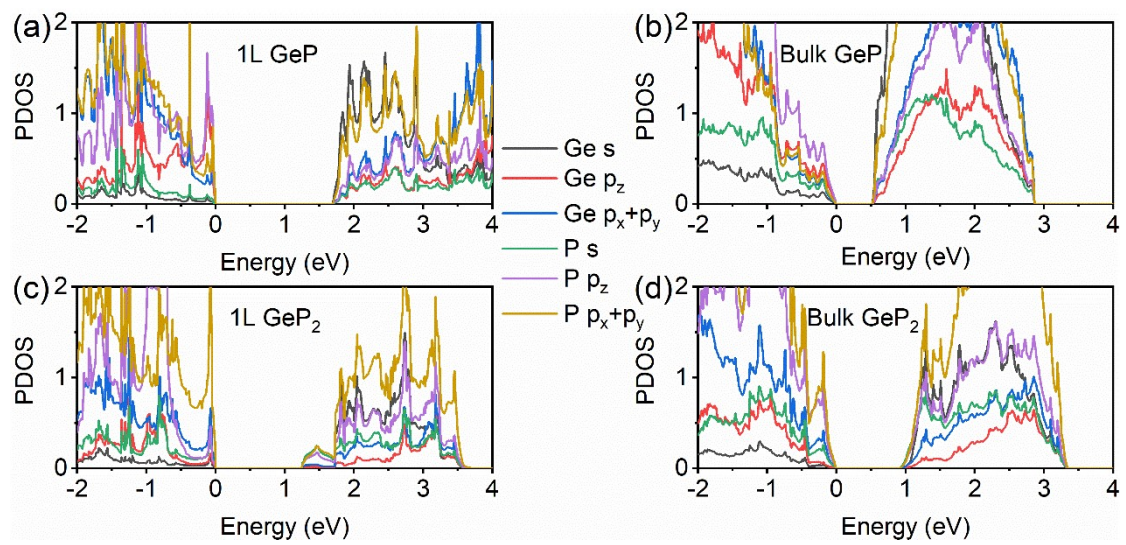

**Figure S5.** Partial density of states for (a, b) 1L and bulk GeP, respectively; (c, d) 1L and bulk GeP<sub>2</sub>, respectively.

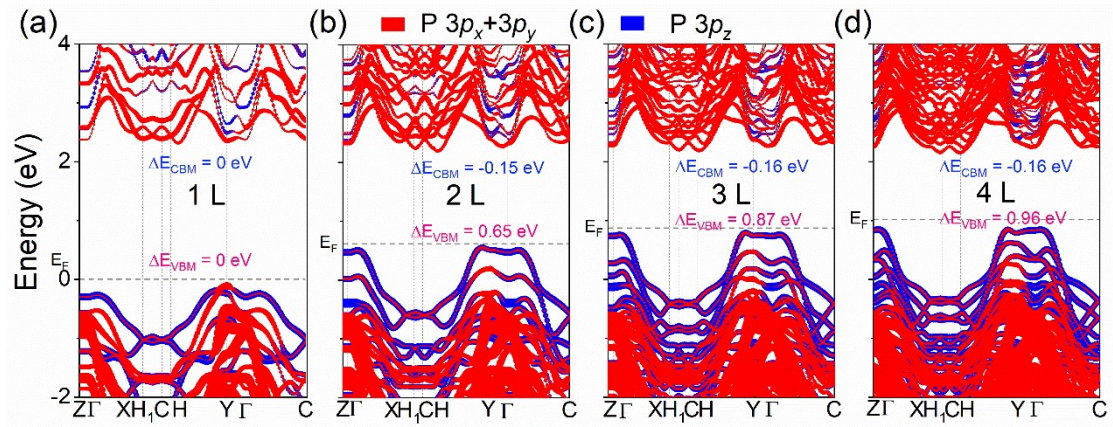

**Figure S6.** HSE06 calculated band structures of GeP of (a) monolayer (1L), (b) bilayer (2L), (c) trilayer (3L) and (d) quad-layer (4L), aligned based on the vacuum level (the Fermi level of 1L GeP is set as 0 eV).



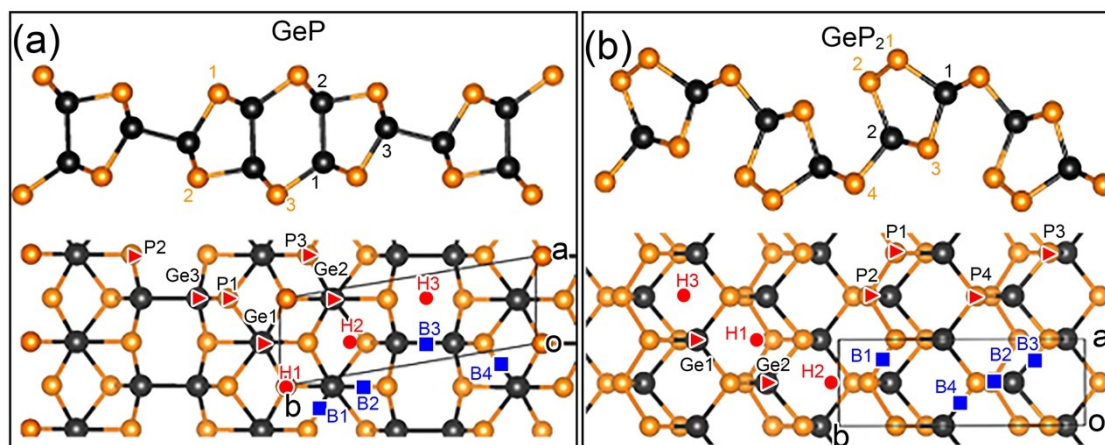

**Figure S7.** Schemes of sites for self-interstitials or adatoms in (a) GeP and (b) GeP<sub>2</sub>.

**Table S2.** Relative energies of self-interstitials on different sites in GeP and GeP<sub>2</sub>.

| GeP   |                 |                | GeP <sub>2</sub> |                 |                |
|-------|-----------------|----------------|------------------|-----------------|----------------|
| Sites | Energy (eV)     |                | Sites            | Energy (eV)     |                |
|       | Ge <sub>i</sub> | P <sub>i</sub> |                  | Ge <sub>i</sub> | P <sub>i</sub> |
| Ge1   | 0.27            | -              | Ge1              | -               | -              |
| Ge2   | 0.24            | -              | Ge2              | -               | -              |
| Ge3   | 0.20            | -              | P1               | 0.82            | 1.18           |
| P1    | -               | 0.29           | P2               | -               | -              |
| P2    | -               | 0.45           | P3               | -               | -              |
| P3    | -               | 0.30           | P4               | 0.83            | 1.26           |
| B1    | 0.31            | -              | B1               | 0               | 0              |
| B2    | 0.31            | 0              | B2               | 1.04            | 1.07           |
| B3    | -               | 0.97           | B3               | 1.14            | 1.58           |
| B4    | -               | 0.40           | B4               | 1.45            | -              |
| H1    | 0.35            | 0.44           | H1               | 1.09            | 1.33           |
| H2    | 0.09            | 0.34           | H2               | 0.47            | 0.86           |
| H3    | 0               | 0.31           | H3               | 0.81            | -              |
| In    | 0.73            | 0.96           | In               | -               | -              |

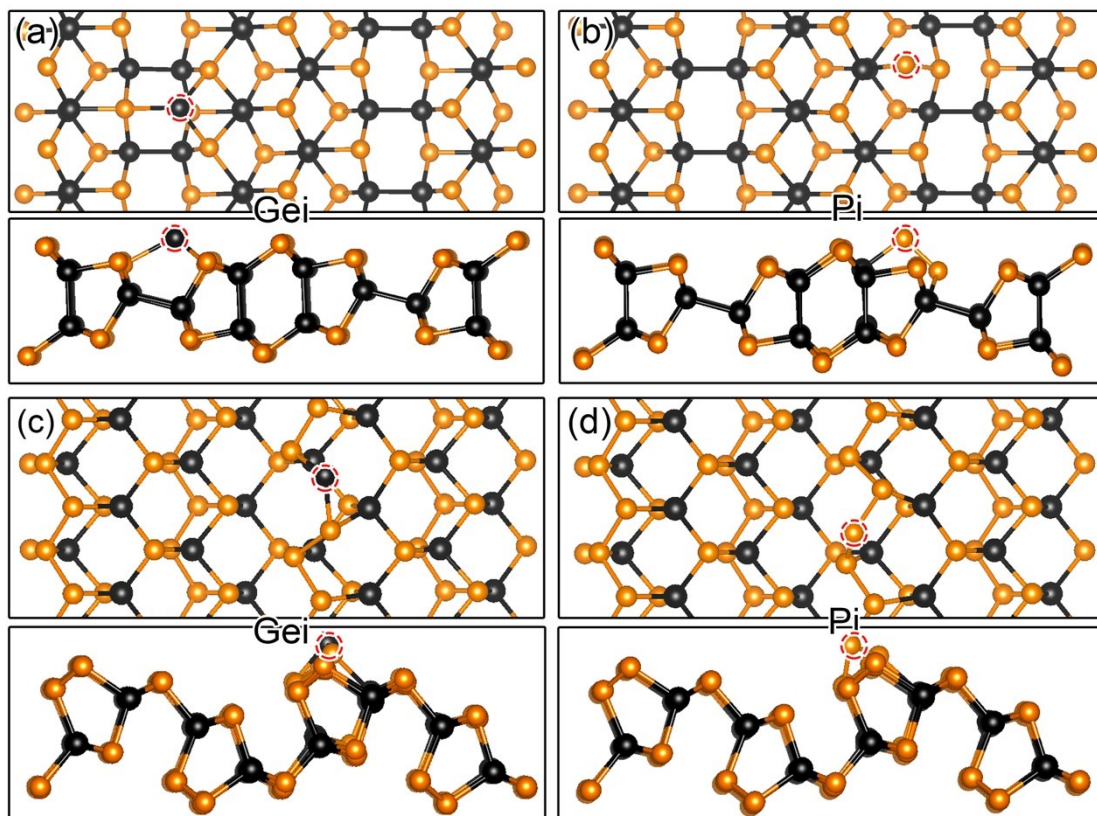

**Figure S8.** Atomic configurations of the most favorable sites for self-interstitials (a)

$\text{Ge}_i$  in  $\text{GeP}$ , (b)  $\text{P}_i$  in  $\text{GeP}$ , (c)  $\text{Ge}_i$  in  $\text{GeP}_2$ , and (d)  $\text{P}_i$  in  $\text{GeP}_2$ .

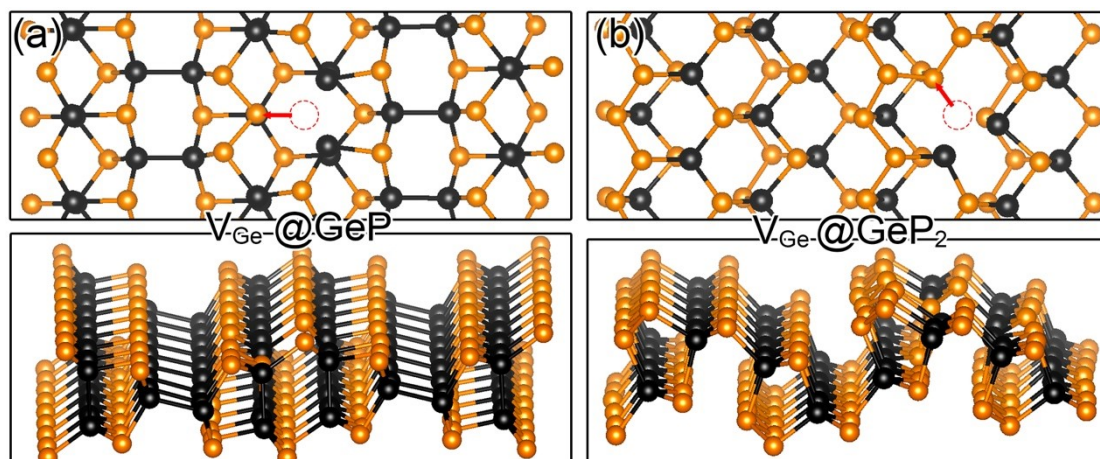

**Figure S9.** Atomic configurations of Ge vacancy ( $V_{\text{Ge}}$ ) in (a) GeP and (b) GeP<sub>2</sub>.

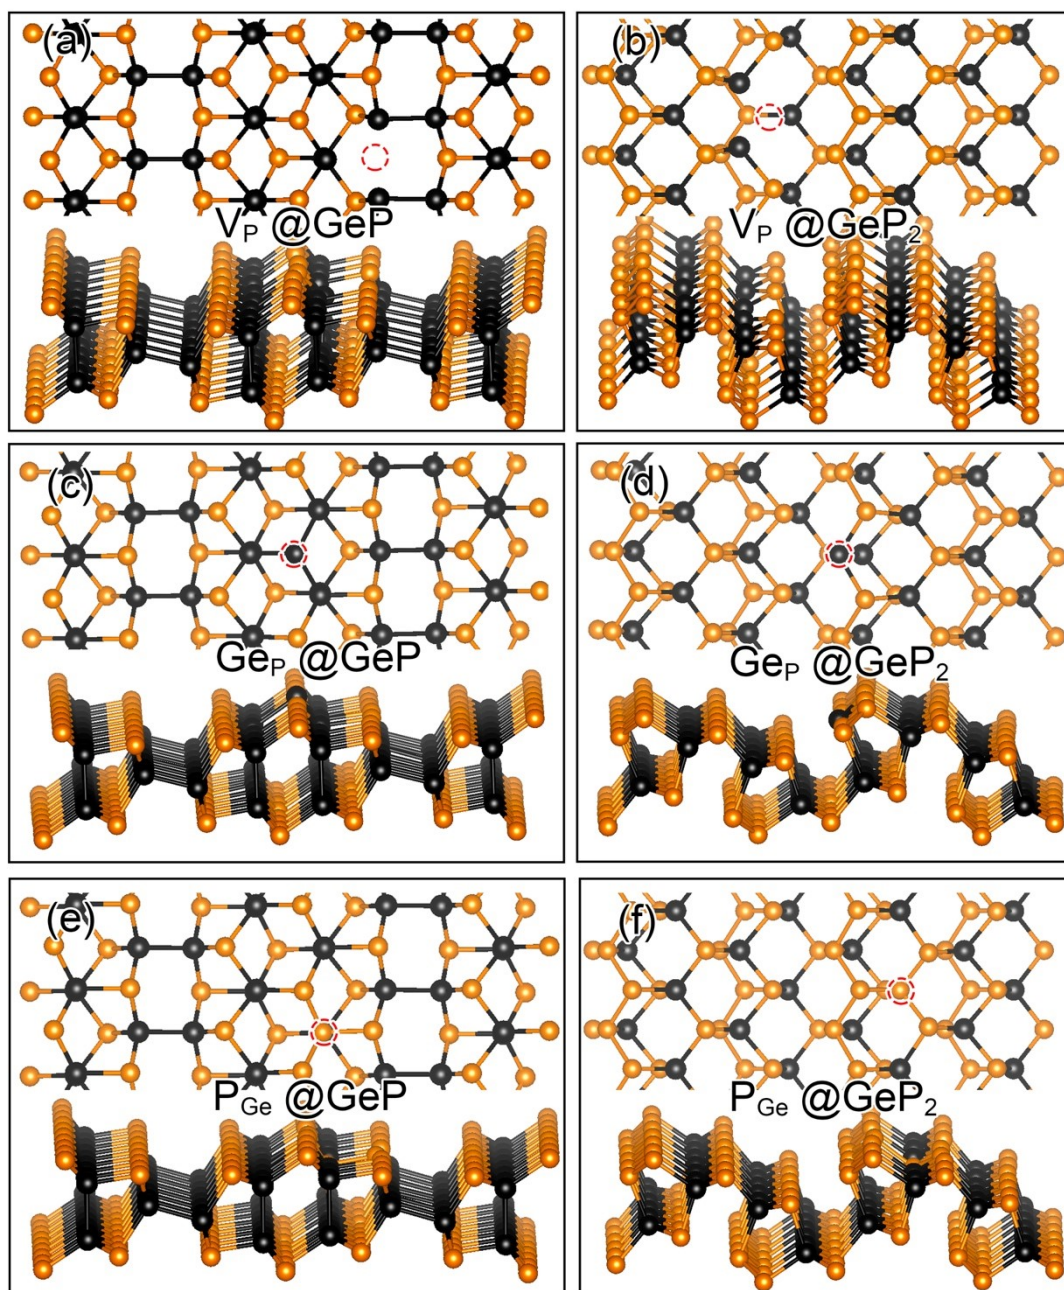

**Figure S10.** Atomic configurations of P vacancy ( $V_P$ ) in (a) GeP and (b)  $GeP_2$ , antisite  $Ge_P$  in (c) GeP and (d)  $GeP_2$ , and antisite  $P_{Ge}$  in (e) GeP and (f)  $GeP_2$ .



**Table S3.** Interlayer-spacing, thickness of each layer and relative total energies of pristine and defective GeP and GeP<sub>2</sub> under fixed-supercell and full relaxations.

|                  |                  | Interlayer-spacing (Å) |              | Thickness of each layer (Å) |              | Energy (eV)     |              |
|------------------|------------------|------------------------|--------------|-----------------------------|--------------|-----------------|--------------|
|                  |                  | Fixed-supercell        | Full-relaxed | Fixed-supercell             | Full-relaxed | Fixed-supercell | Full-relaxed |
| GeP              | Pristine         | 1.46                   | 1.46         | 6.44                        | 6.44         | 0               | 0            |
|                  | Ge <sub>P3</sub> | 1.46                   | 1.44         | 6.44                        | 6.40         | 0               | -0.02        |
|                  | P <sub>Ge2</sub> | 1.43                   | 1.42         | 6.44                        | 6.42         | 0               | -0.00(07)    |
| GeP <sub>2</sub> | Pristine         | 1.33                   | 1.34         | 7.18                        | 7.18         | 0               | 0            |
|                  | Ge <sub>P2</sub> | 1.30                   | 1.27         | 7.18                        | 7.18         | 0               | -0.04        |
|                  | P <sub>Ge1</sub> | 1.33                   | 1.32         | 7.18                        | 7.19         | 0               | -0.03        |

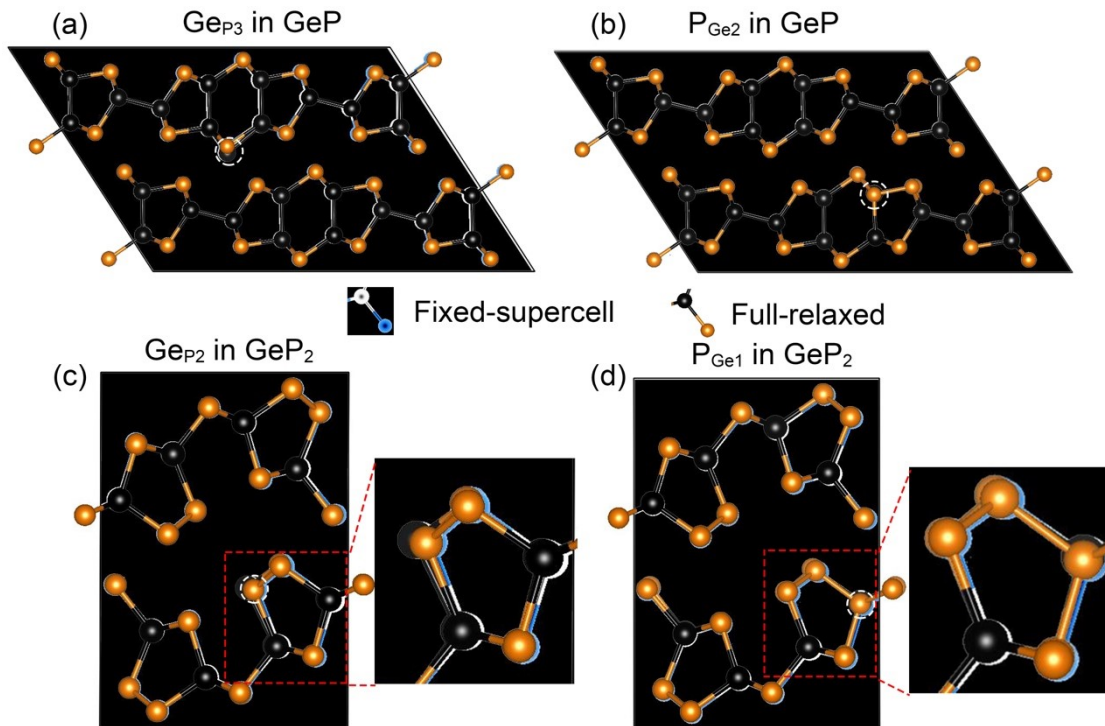

**Figure S11.** Comparison of relaxed structures with antisite defects under full-relaxed and fixed-supercell relaxed methods (white shadow indicating positions of atom under fixed-supercell relaxation).

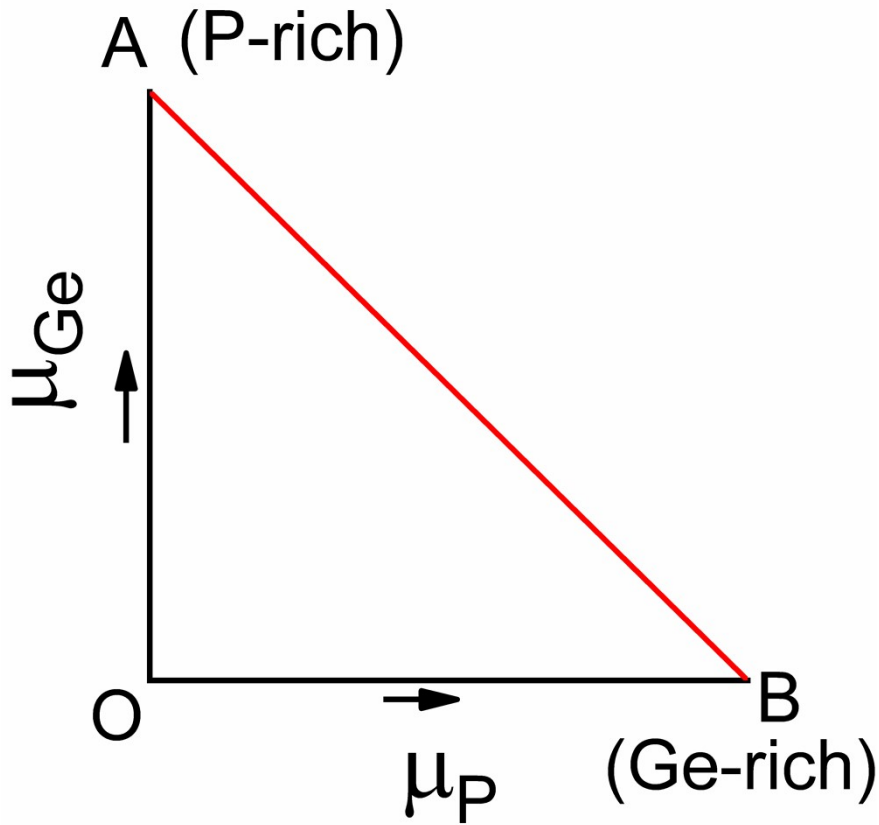

**Figure S12.** The chemical potential of host elements,  $\mu_{\text{Ge}}$  and  $\mu_{\text{P}}$ , satisfying the relation  $\mu_{\text{Ge}} + \mu_{\text{P}} = \Delta H(\text{GeP})$ , in the range of the red line AB. Point A (P-rich, bulk GeP:  $\mu_{\text{Ge}} = -0.03$  eV and  $\mu_{\text{P}} = 0$  eV, monolayer GeP:  $\mu_{\text{Ge}} = -0.03$  eV and  $\mu_{\text{P}} = 0$  eV) and point B (Ge-rich, bulk GeP:  $\mu_{\text{Ge}} = 0$  eV and  $\mu_{\text{P}} = -0.03$  eV, monolayer GeP:  $\mu_{\text{Ge}} = 0$  eV and  $\mu_{\text{P}} = -0.03$  eV), are boundaries of PBE calculated chemical potential range. For the HSE06 calculated chemical potential range, point A (P-rich condition, bulk GeP:  $\mu_{\text{Ge}} = -0.058$  eV and  $\mu_{\text{P}} = 0$  eV, 1L GeP:  $\mu_{\text{Ge}} = -0.055$  eV and  $\mu_{\text{P}} = 0$  eV) and point B (Ge-rich condition, bulk GeP:  $\mu_{\text{Ge}} = 0$  eV and  $\mu_{\text{P}} = -0.058$  eV, 1L GeP:  $\mu_{\text{Ge}} = 0$  eV and  $\mu_{\text{P}} = -0.055$  eV) are boundaries.

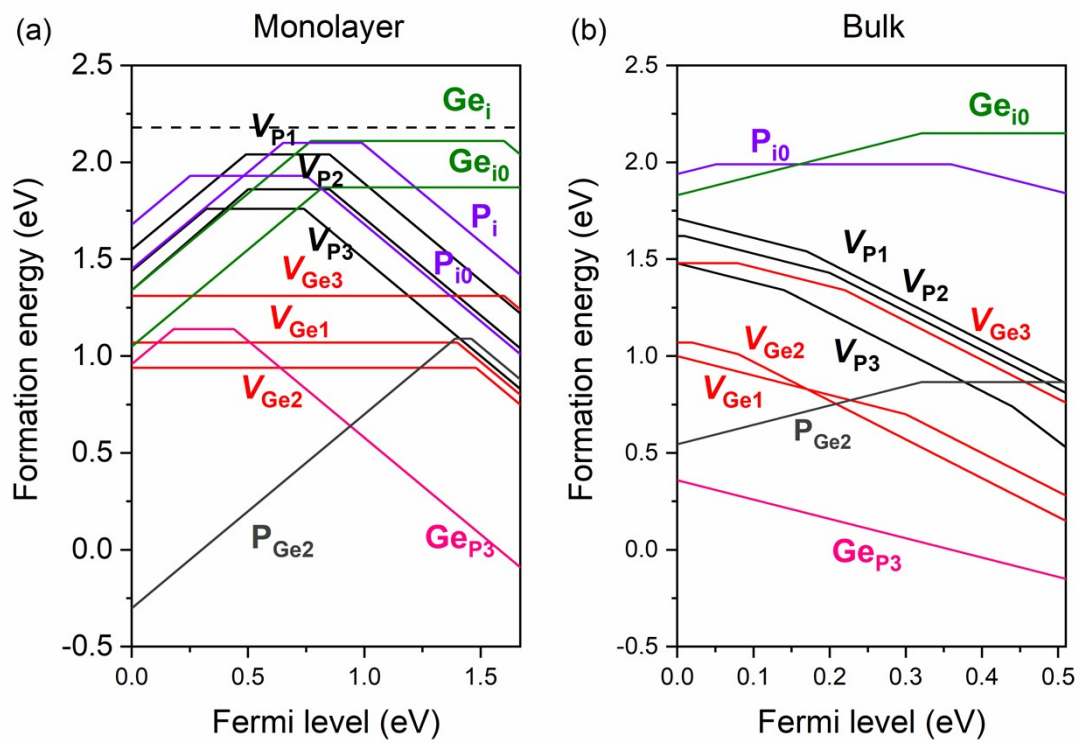

**Figure S13.** PBE calculated formation energy for all possible intrinsic defects in (a) monolayer GeP and (b) bulk GeP at Ge-rich condition.



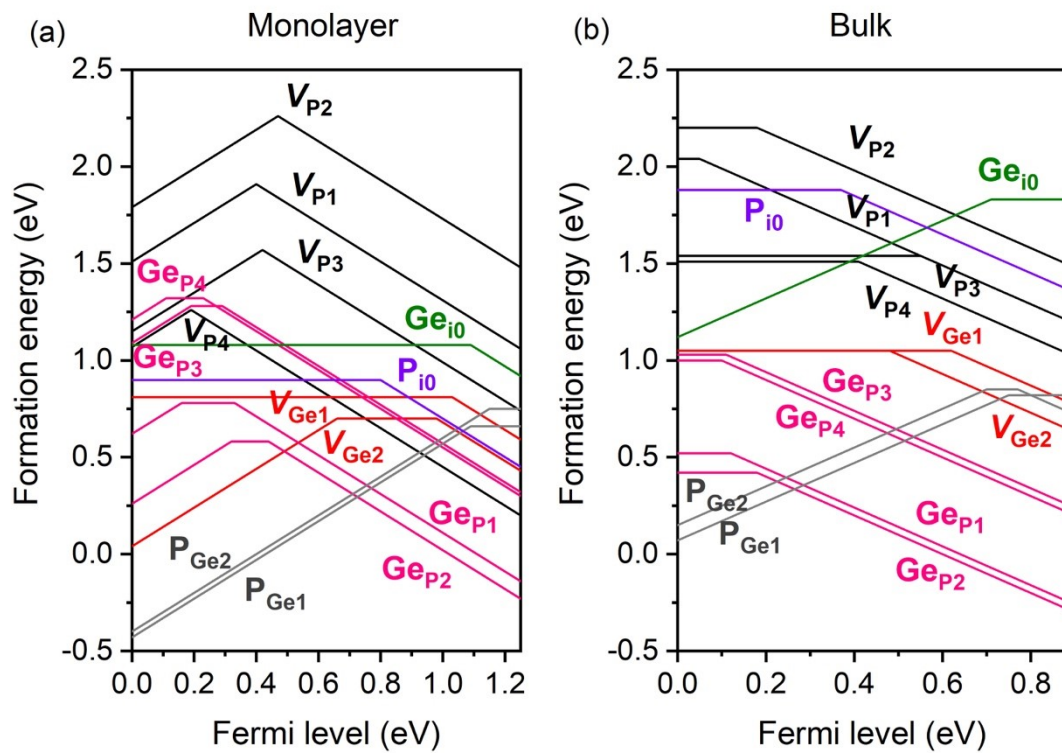

**Figure S14.** PBE calculated formation energy for all possible intrinsic defects in (a) monolayer GeP<sub>2</sub> and (b) bulk GeP<sub>2</sub> at Ge-rich condition.

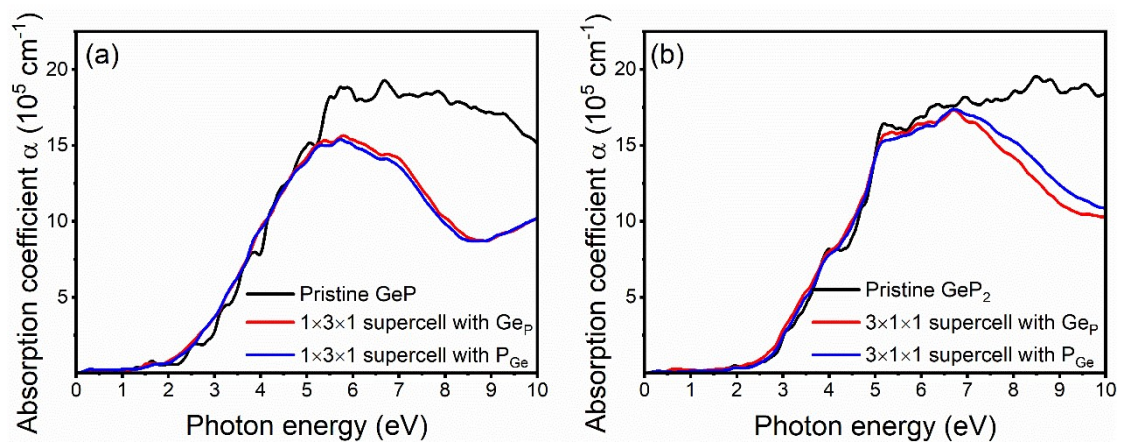

**Figure S15.** HSE06 calculated optical absorption coefficients of pristine and defective supercells (with antisites Ge<sub>P</sub> and P<sub>Ge</sub>) of (a) GeP and (b) GeP<sub>2</sub>.

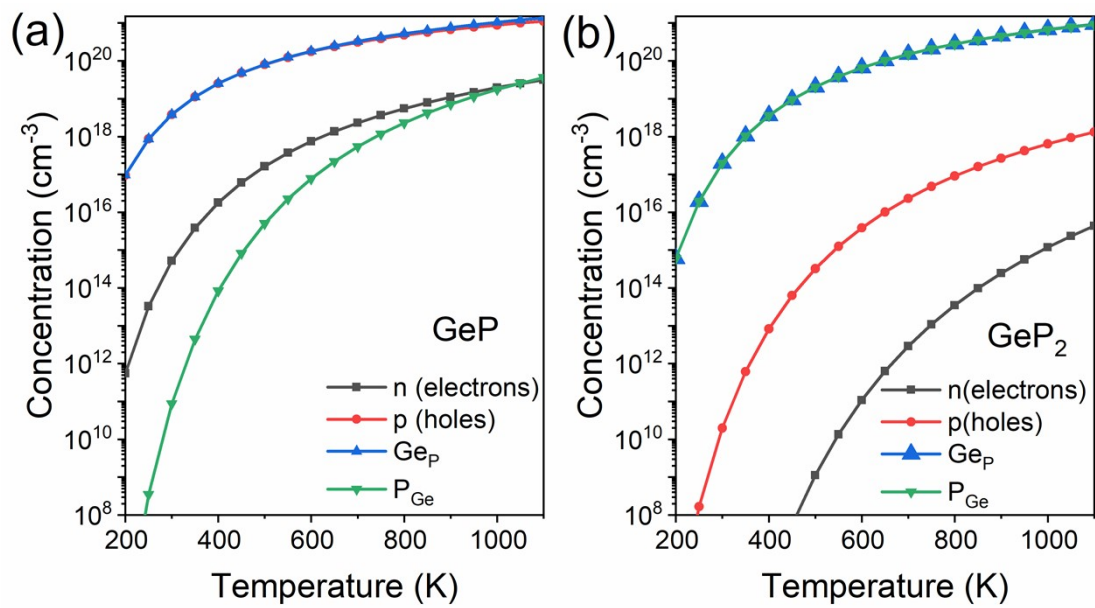

**Figure S16.** The carrier and defect concentrations as function of temperature for defects in bulk (a) GeP and (b) GeP<sub>2</sub>.
